# Supplementary material for: Structural insight into the macrocyclic inhibitor TPX-0022 of c-Met and c-Src
Source: PubMed Central journal article supplement — Comput Struct Biotechnol J. 2023 Nov 17;21:5712–8. doi: 10.1016/j.csbj.2023.11.028 (PMC10708960; doi:10.1016/j.csbj.2023.11.028), 2023-11-17
Supplement: mmc3.pdf [file mmc3.pdf]

## Supplementary information for

### Structural insight into the macrocyclic inhibitor TPX-0022 of c-Met and c-Src

Table S1 Data collection and refinement statistics

|                                        | c-Met/TPX-0022       | c-Src/TPX-0022     |
|----------------------------------------|----------------------|--------------------|
| PDB code                               | 8K78                 | 8K79               |
| <b>Data collection</b>                 |                      |                    |
| Space group                            | P 1 2 <sub>1</sub> 1 | P 1                |
| Cell dimensions                        |                      |                    |
| a, b, c (Å)                            | 45.1, 66.6, 55.3     | 41.9, 63.1, 73.1   |
| $\alpha$ , $\beta$ , $\gamma$ (°)      | 90.0, 107.0, 90.0    | 100.5, 91.1, 90.2  |
| Resolution (Å)                         | 43.1-2.7 (2.8-2.7)   | 24.0-2.8 (2.9-2.8) |
| $R_{\text{sym}}$ or $R_{\text{merge}}$ | 0.2(0.7)             | 0.4(0.8)           |
| Mean I/sigma(I)                        | 4.1(2.5)             | 2.6 (1.2)          |
| Completeness (%)                       | 95.8 (97.8)          | 99.4 (100.0)       |
| Redundancy                             | 3.1(3.4)             | 3.2 (3.1)          |
| CC1/2                                  | 0.58(0.22)           | 0.97(0.77)         |
| <b>Refinement</b>                      |                      |                    |
| Resolution (Å)                         | 43.1-2.7             | 24.0-2.8           |
| Unique reflections                     | 8618 (873)           | 17968 (1789)       |
| $R_{\text{work}}$ / $R_{\text{free}}$  | 0.24/0.29            | 0.24/0.28          |
| No. atoms                              |                      |                    |
| Protein                                | 2305                 | 3941               |
| Ligand/ion                             | 30                   | 60                 |
| Water                                  | 63                   | 84                 |
| <i>B</i> -factors                      |                      |                    |
| Protein                                | 31.2                 | 21.8               |
| Ligand/ion                             | 21.5                 | 28.3               |
| Water                                  | 24.7                 | 12.9               |
| R.m.s. deviations                      |                      |                    |
| Bond lengths (Å)                       | 0.005                | 0.006              |
| Bond angles (°)                        | 0.67                 | 0.91               |

Table S2 The binding free energy and Ki value of c-Met resistance-relevant mutations predicted by molecular docking.

|              | Binding Free Energy (kcal/mol) | Ki (nM) |
|--------------|--------------------------------|---------|
| c-Met WT     | -9.7                           | 78.9    |
| c-Met G1163R | -9.6                           | 86.8    |
| c-Met L1195F | -9.7                           | 75.3    |
| c-Met F1200I | -9.1                           | 158.4   |
| c-Met D1228N | -8.5                           | 516.0   |
| c-Met Y1230H | -8.8                           | 307.1   |
| c-Met Y1230C | -8.3                           | 737.8   |

Table S3 Prediction of ADME/drug-likeness properties for macrocyclic inhibitors

|                       | TPX-0022            | D6808                                                | MC25b                                                               | Lorlatinib          | TPX-0005                          |
|-----------------------|---------------------|------------------------------------------------------|---------------------------------------------------------------------|---------------------|-----------------------------------|
| GI absorption         | High                | High                                                 | Low                                                                 | High                | High                              |
| BBB permeant          | No                  | No                                                   | No                                                                  | No                  | No                                |
| Pgp substrate         | Yes                 | No                                                   | Yes                                                                 | Yes                 | Yes                               |
| CYP1A2 inhibitor      | No                  | No                                                   | No                                                                  | No                  | No                                |
| CYP2C19 inhibitor     | No                  | Yes                                                  | No                                                                  | No                  | No                                |
| CYP2C9 inhibitor      | Yes                 | Yes                                                  | No                                                                  | No                  | No                                |
| CYP2D6 inhibitor      | No                  | No                                                   | No                                                                  | No                  | No                                |
| CYP3A4 inhibitor      | No                  | No                                                   | No                                                                  | Yes                 | No                                |
| Log Kp [cm/s]         | -7.29 cm/s          | -6.73 cm/s                                           | -7.81 cm/s                                                          | -7.69 cm/s          | -6.33 cm/s                        |
| Lipinski              | Yes;<br>0 violation | Yes; 1 violation:<br>MW>500                          | No; 2 violations:<br>MW>500, NorO>10                                | Yes;<br>0 violation | Yes;<br>0 violation               |
| Ghose                 | Yes                 | No; 3 violations:<br>MW>480,<br>WLOGP>5.6,<br>MR>130 | No; 4 violations:<br>MW>480,<br>WLOGP<-0.4,<br>MR>130,<br>#atoms>70 | Yes                 | No;<br>1 violation:<br>WLOGP<-0.4 |
| Veber                 | Yes                 | Yes                                                  | No; 1 violation:<br>TPSA>140                                        | Yes                 | Yes                               |
| Egan                  | Yes                 | Yes                                                  | No; 1 violation:<br>TPSA>131.6                                      | Yes                 | Yes                               |
| Muegge                | Yes                 | Yes                                                  | No; 2 violations:<br>MW>600,<br>TPSA>150                            | Yes                 | Yes                               |
| Bioavailability Score | 0.55                | 0.55                                                 | 0.11                                                                | 0.55                | 0.55                              |

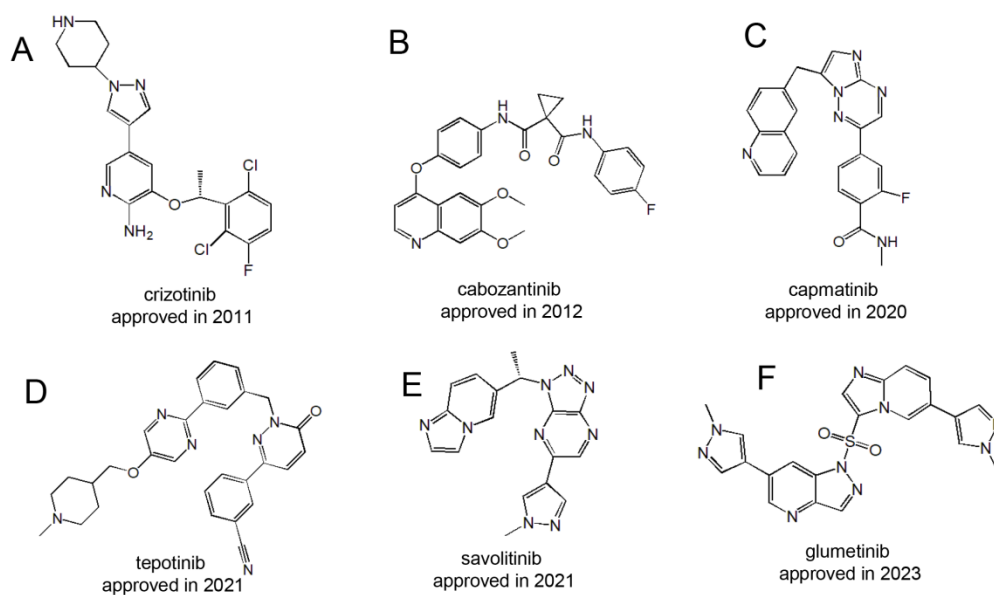

Figure S1 Chemical structures of the approved c-Met inhibitors.

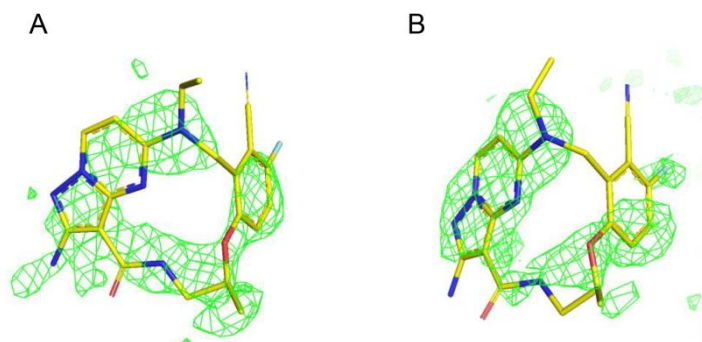

Figure S2 The simulated annealing omit map at  $3\sigma$  shows the quality and occupancy of TPX-0022 in the structure of c-Met/TPX-0022 complex (A) and c-Src/TPX-0022 (B).

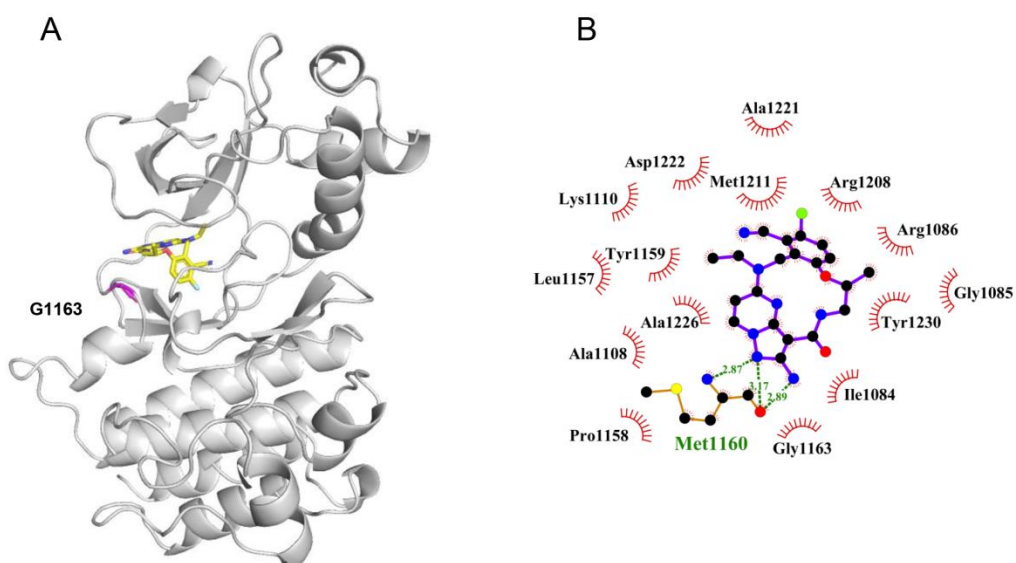

Figure S3 (A) The structure of c-Met/TPX-0022 complex. (B) Detailed interactions between TPX-0022 and c-Met. The interactions are analyzed using ligplot.

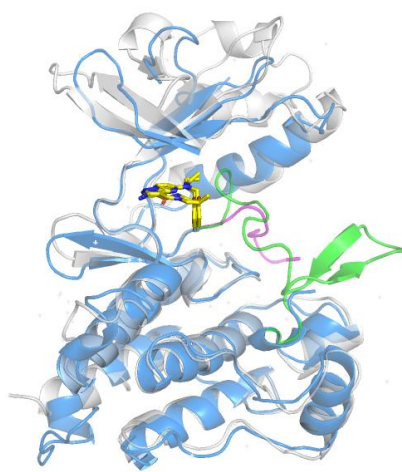

Figure S4 Superimposition of c-Met/TPX-0022 (gray) and c-Src/TPX-0022 (blue) structures.

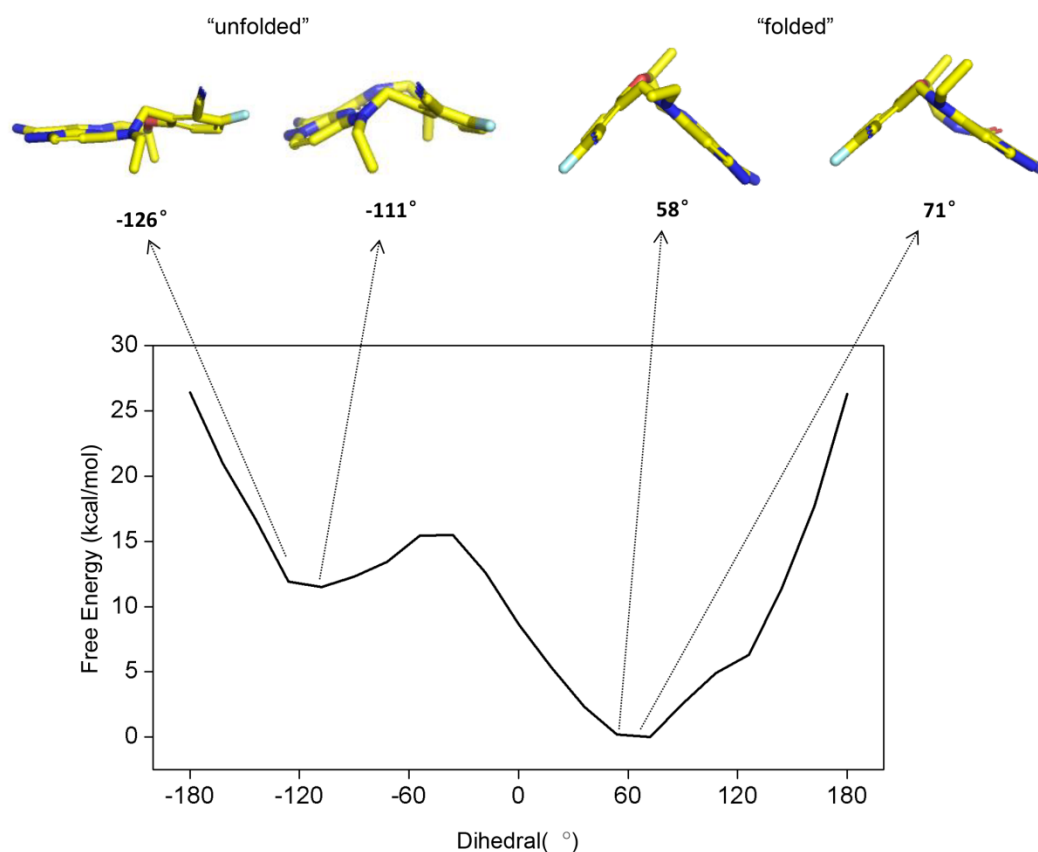

Figure S5 Torsional angle scan calculations of TPX-0022. Torsional angle scan was performed by the *Schrödinger Maestro* software.

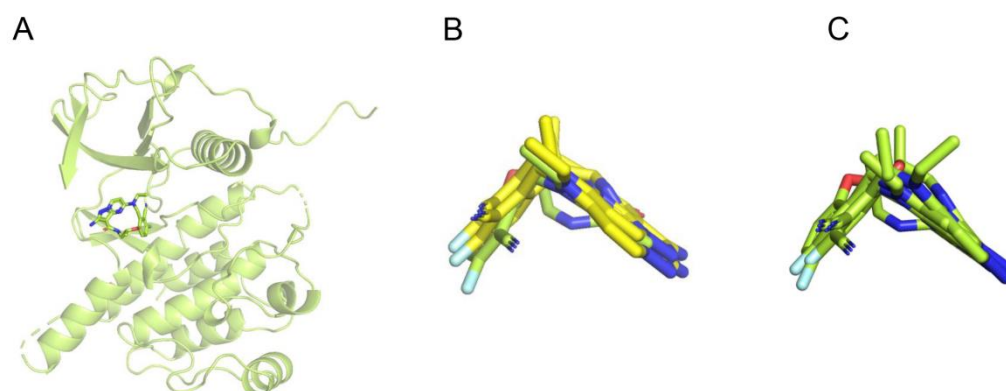

Figure S6 Docking model of TPX-0022 to CSF1R. (A) The modelled structure of CSF1R/TPX-0022 complex. Molecular docking was performed by AutoDock tools program. (B-C) Conformations of TPX-0022 in the complexes with c-Met, c-Src and CSF1R. TPX-0022 from molecular docking is colored limon. TPX-0022 from crystal structure of c-Met/TPX-0022 or c-Src/TPX-0022 complex is colored yellow.

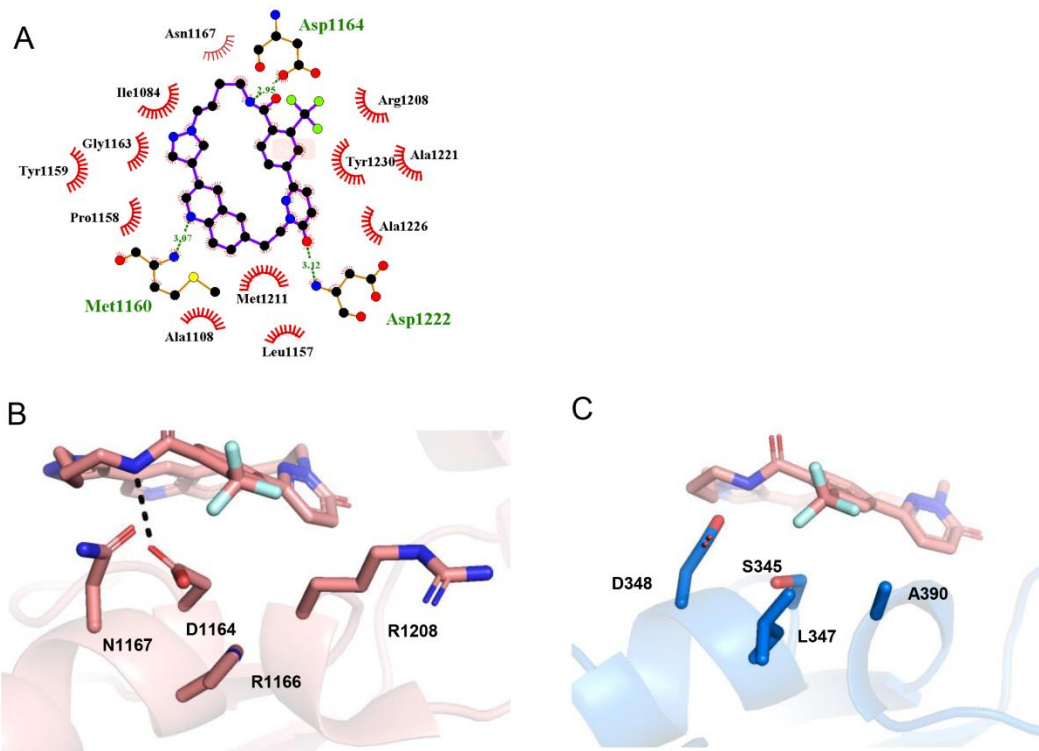

Figure S7 Structural basis of D6808 with c-Met (PDB: 8GVJ). (A) Detailed interactions between D6808 and c-Met. The interactions are analyzed using ligplot. (B) The interactions of the trifluoromethyl group of D6808 with the surrounding residues of c-Met. (C) The interactions of the trifluoromethyl group of D6808 with the surrounding residues of c-Src. The modelled c-Src/D6808 structure was acquired by a superposition of c-Src/TPX-0022 structure with the c-Met/D6808 structure. Hydrogen bond is shown as black dotted lines. c-Met/D6808 complex is colored deep salmon. c-Src is colored marine.

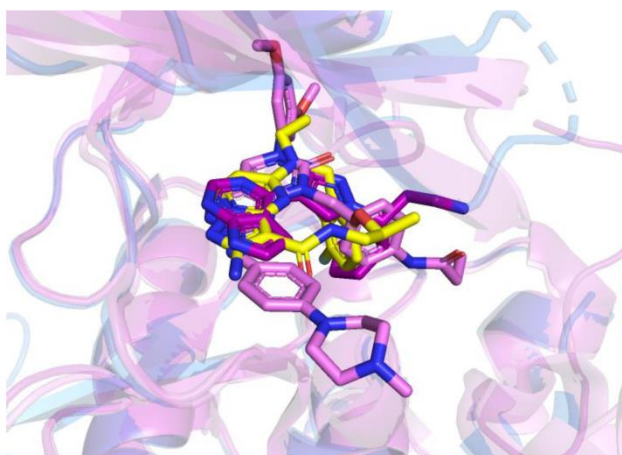

Figure S8 Superimposition of c-Src/TPX-0022(yellow), c-Src/Ruxolitinib (PDB ID: 4U5J) (purple) and c-Src/FIIN-2 (PDB ID: 7D57) (violet) structures.

| A Hinge |        |         | B $\beta$ 7 |        |             |
|---------|--------|---------|-------------|--------|-------------|
| c-Met   | [1158] | LPYMKHG | c-Met       | [1206] | AARNCMLDEKF |
| ALK     | [1196] | LELMAGG | ALK         | [1251] | AARNCLLTCPG |
| c-Src   | [338]  | TEYMSKG | c-Src       | [388]  | RAANILVGENL |
| TRK     | [590]  | MEYMRHG | TRK         | [652]  | ATRNCLVGQGL |
| EGFR    | [790]  | MQLMPFG | EGFR        | [839]  | AAENVLVKTPQ |
| FGFR1   | [561]  | VEYASKG | FGFR1       | [625]  | AARNVLTEDN  |
| PDGFRA  | [674]  | TEYCFYG | PDGFRA      | [820]  | AARNVLLAQGK |
| ABL     | [315]  | TEFMTYG | ABL         | [365]  | AARNCLVGENH |
| JAK     | [623]  | QEFVKFG | JAK         | [1105] | AARNVLESEH  |

Figure S9 Sequence alignment of the hinge loop (A) and  $\beta$ 7 (B) sheet residues of kinase proteins.



|         | Mutations    | L1195F | F1200I | G1163R | D1228N | Y1230H | Y1230C |
|---------|--------------|--------|--------|--------|--------|--------|--------|
| Type I  | TPX-0022     | Green  | Yellow | Green  | Red    | Yellow | Red    |
|         | Crizotinib   | Green  | Yellow | Red    | Red    | Red    | Red    |
|         | Capmatinib   | Green  | Green  | Green  | Red    | Red    | Red    |
|         | Tepotinib    | Green  | Green  | Yellow | Red    | Red    | Red    |
|         | Savolitinib  | Green  | Green  | Green  | Red    | Red    | Red    |
| Type II | Cabozantinib | Red    | Red    | Yellow | Green  | Green  | Green  |

$IC_{50} \leq 50nM$ 
  $50nM < IC_{50} < 200nM$ 
  $IC_{50} \geq 200nM$

Figure S10 The inhibitory potency of inhibitors against c-Met resistance-relevant mutations.
